# Supplementary material for: A new method to discriminate secondary organic aerosols from different sources using high-resolution aerosol mass spectra
Source: Copernicus journal article supplement (doi:10.5194/acp-12-2189-2012), 2012-02-28
Supplement: Supplementary file 1 [file acp-12-2189-2012-supplement.zip]

## Supplementary information for manuscript

### A new method to discriminate secondary organic aerosols from different sources using high-resolution aerosol mass spectra

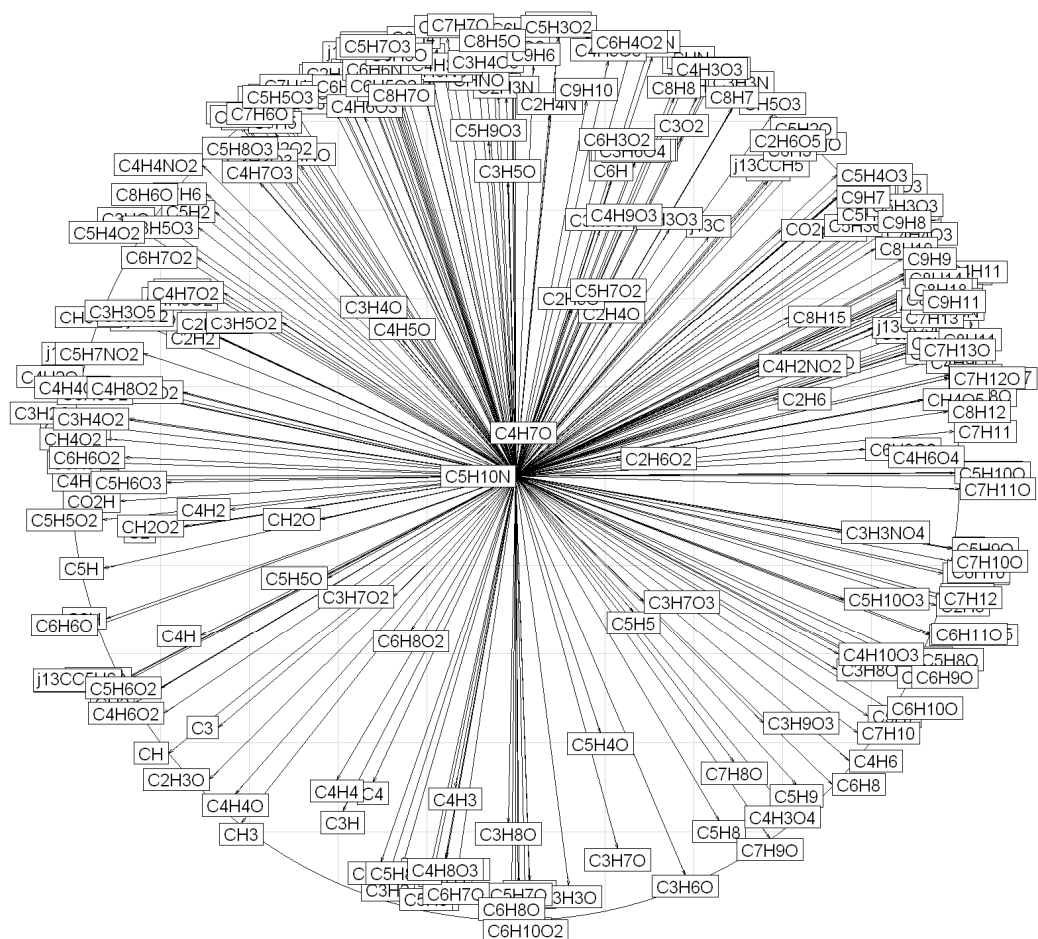

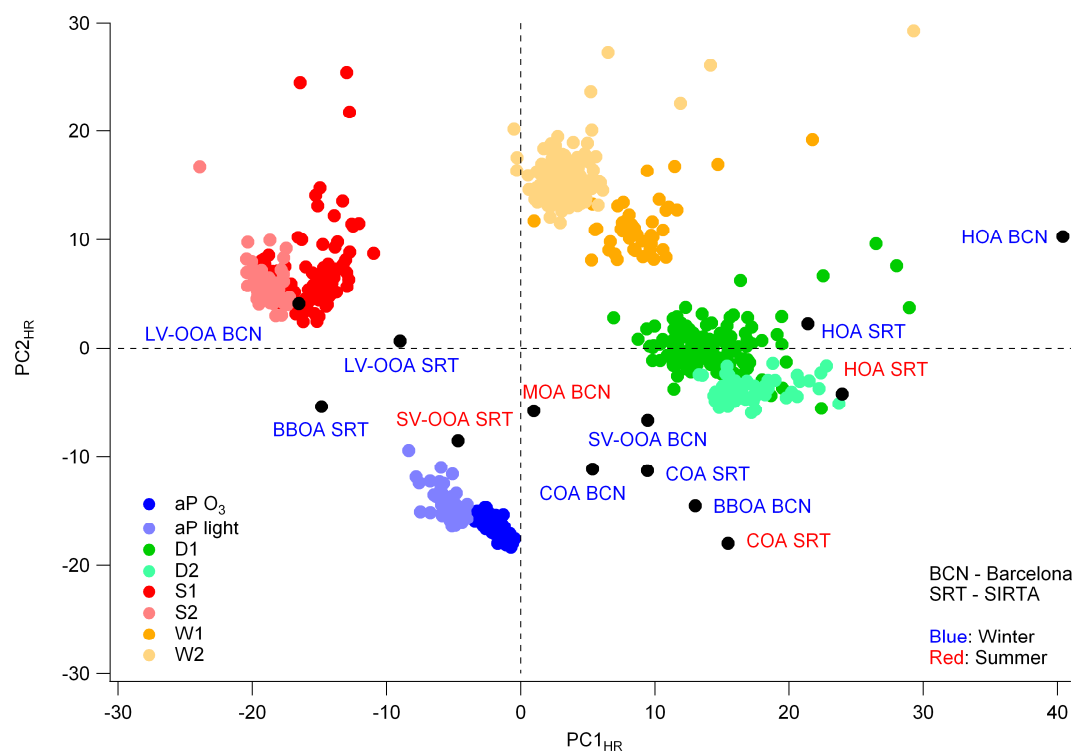

**Figure SI-2.** Projection of the SOA and POA spectra retrieved in Barcelona (BCN) and Sirta (SRT) in summer (red text) and winter (blue text). The primary sources are marked as HOA: hydrocarbon-like OA, BBOA: biomass burning OA, COA: cooking OA and MOA: marine OA. A detailed description of the Barcelona and Sirta data can be found in Mohr et al., 2012 and Crippa et al., 2012 respectively.
