# Supplementary material for: A new method to discriminate secondary organic aerosols from different sources using high-resolution aerosol mass spectra
Source: Copernicus journal article supplement (doi:10.5194/acp-12-2189-2012), 2012-02-28
Supplement: Supplementary file 2 [file acp-12-2189-2012-supplement.zip]

Archive with 2 entries (2 files):
- Heringa HR PCA model.xls
- Heringa SOA Manuscript SupInfo v2.pdf
