# Supplementary material for: A new method to discriminate secondary organic aerosols from different sources using high-resolution aerosol mass spectra
Source: Copernicus journal article supplement (doi:10.5194/acp-12-2189-2012), 2012-02-28
Supplement: Supplementary file 2 [file acp-12-2189-2012-supplement.zip › Heringa HR PCA model.xls]

## Sheet: PCA
PCA model based on the averaged HR spectra as described in Heringa et al., 2012						PC1	-3.31286
						PC2	-16.1033
To get the coordinates of a spectrum, enter the normalized spectrum (100%) in column G.
Use 0 in case the specific ion was not fit.
Ion	m/z	Loading norm.PC1	Loading norm.PC2	Variable mean	Variable stdev	Spectrum (100%)	Spectrum norm	PC1	PC2
C	12	0.035842	0.049787	0.717473	0.10069	0.68611	-0.311479	-0.011164	-0.0155076
j13C	13.0034	0.035842	0.0497869	0.00775997	0.00108904	0.00742076	-0.311478	-0.011164	-0.0155076
CH	13.0078	-0.0646079	-0.0576006	0.302623	0.0526304	0.362016	1.1285	-0.0729097	-0.065002
CH2	14.0157	-0.070956	-0.0473398	0.754706	0.75474	1.51955	1.01339	-0.071906	-0.0479736
CH3	15.0235	-0.0510599	-0.0720559	2.33126	0.594572	3.17228	1.41449	-0.0722237	-0.101922
O	15.9949	-0.0622523	0.0323429	0.0689431	0.00819454	0.0702129	0.154962	-0.00964676	0.00501193
CH4	16.0313	0.0468449	0.0614298	0.115336	0.0378851	0.087523	-0.734144	-0.0343909	-0.0450983
HO	17.0027	-0.0622526	0.0323426	0.430894	0.0512157	0.438831	0.154972	-0.00964739	0.00501218
j18O	17.9992	-0.0622534	0.0323414	0.000141334	1.67987e-05	0.000143936	0.154923	-0.00964445	0.00501042
H2O	18.0106	-0.0622522	0.0323431	1.72358	0.204862	1.75532	0.154943	-0.00964558	0.00501135
Hj18O	19.007	-0.0622529	0.0323419	0.000883312	0.000104992	0.000899583	0.154976	-0.00964773	0.00501224
H2j18O	20.0148	-0.0622523	0.0323429	0.00353333	0.000419969	0.00359841	0.154957	-0.0096464	0.00501175
CO2plus2	21.9949	0.0493643	0.0512441	0.0303093	0.00550248	0.027557	-0.500195	-0.0246918	-0.025632
C2	24	-0.0671011	-0.0115132	0.0848142	0.0116884	0.0952005	0.888593	-0.0596256	-0.0102306
C2H	25.0078	-0.0761465	-0.029491	0.311756	0.0294794	0.338705	0.914178	-0.0696115	-0.02696
CN	26.0031	0.0304344	0.0837448	0.0373438	0.029298	0	-1.27462	-0.0387922	-0.106743
C2H2	26.0157	-0.0551105	0.0287721	1.56458	0.0268808	1.57238	0.290328	-0.0160001	0.00835332
CHN	27.0109	0.0325635	0.0848499	0.206442	0.131992	0.00754778	-1.50686	-0.0490687	-0.127857
j13CCH2	27.019	-0.0692504	0.0254159	0.00854289	0.0147967	0	-0.57735	0.0399817	-0.0146739
C2H3	27.0235	0.0781853	-0.0267517	3.96384	0.321889	4.05861	0.294428	0.02302	-0.00787646
CO	27.9949	-0.0622524	0.0323426	7.66034	0.910506	7.80143	0.154961	-0.0096467	0.00501184
CHO	29.0027	-0.0294058	0.0858683	4.11988	0.598722	3.30038	-1.36875	0.0402492	-0.117532
C2H5	29.0391	0.0471205	0.0622453	2.20226	0.594793	1.27737	-1.55498	-0.0732712	-0.09679
Cj18O	29.9992	-0.0622521	0.0323428	0.0157037	0.00186656	0.0159929	0.154944	-0.0096456	0.00501133
j13CHO	30.0061	-0.0294058	0.0858684	0.0445594	0.00647559	0.0356959	-1.36875	0.0402492	-0.117532
CH2O	30.0106	-0.0364496	-0.00892872	0.721841	0.062714	0.691245	-0.487863	0.0177824	0.004356
CH4N	30.0344	0.0217587	0.0655878	0.347242	0.601441	0	-0.57735	-0.0125624	-0.0378671
j13CCH5	30.0425	0.0471204	0.0622453	0.047638	0.0128662	0.0276314	-1.55497	-0.0732708	-0.0967895
C2H6	30.047	0.0487333	0.016021	0.0851411	0.053221	0.0274181	-1.08459	-0.0528557	-0.0173762
CH3O	31.0184	-0.0567649	0.0387436	1.0829	0.368175	0.738132	-0.936425	0.0531561	-0.0362805
C3	36	-0.05531	-0.0522592	0.0521106	0.0242177	0.0867693	1.43113	-0.0791557	-0.0747897
C3H	37.0078	-0.0321968	-0.069679	0.38674	0.111711	0.573808	1.67457	-0.0539159	-0.116683
C2N	38.0031	-0.00328031	0.0792119	0.0293259	0.0352544	0	-0.831835	0.00272868	-0.0658912
C3H2	38.0157	-0.0238836	-0.0835665	0.651721	0.177324	0.951316	1.68953	-0.0403522	-0.141188
C2HN	39.0109	0.0217587	0.0655878	0.0767459	0.132928	0	-0.57735	-0.0125624	-0.0378671
C3H3	39.0235	0.00247968	-0.0851244	3.80688	0.833308	5.21482	1.68958	0.00418962	-0.143824
C2H2N	40.0187	-0.0692504	0.0254159	0.0360334	0.0624117	0	-0.57735	0.0399817	-0.0146739
C3H4	40.0313	-0.0130803	-0.0805296	0.978899	0.256501	1.42302	1.73146	-0.0226479	-0.139434
C2HO	41.0027	-0.0159861	-0.0855539	0.383581	0.059586	0.452524	1.15704	-0.0184966	-0.0989892
C2H3N	41.0266	-0.00179033	0.0786924	0.155799	0.190069	0	-0.819696	0.00146752	-0.0645039
C3H5	41.0391	0.0769241	-0.0330712	4.4105	0.987421	4.74662	0.340404	0.0261852	-0.0112575
C2H2O	42.0106	-0.0715298	-0.0421061	1.75411	0.469788	2.10161	0.739706	-0.052911	-0.0311461
C2H4N	42.0344	0.00626341	0.075259	0.102939	0.137688	0	-0.747625	-0.00468268	-0.0562655
j13CC2H5	42.0425	0.076924	-0.0330712	0.143108	0.0320389	0.154014	0.340402	0.0261851	-0.0112575
C3H6	42.047	0.0724592	0.0254825	0.885775	0.189694	0.699377	-0.982623	-0.0712001	-0.0250397
CHNO	43.0058	-0.0068516	0.0803091	0.16148	0.187897	0	-0.859408	0.00588831	-0.0690183
C2H3O	43.0184	-0.0569879	-0.0630647	9.65079	3.18875	12.8398	1.00008	-0.0569925	-0.0630698
C2H5N	43.0422	-0.045567	0.076525	0.111061	0.111437	0	-0.996622	0.0454131	-0.0762665
C3H7	43.0548	0.070709	0.0363518	1.34975	0.611596	0.674953	-1.10333	-0.0780155	-0.0401081
CO2	43.9898	-0.0622524	0.0323426	7.66034	0.910506	7.80143	0.154961	-0.0096467	0.00501184
CH2NO	44.0136	-0.0692504	0.0254159	0.0318461	0.0551591	0	-0.57735	0.0399817	-0.0146739
C2H4O	44.0262	0.0178379	0.0316743	0.838583	0.143358	0.646467	-1.34011	-0.0239048	-0.0424471
C2H6N	44.05	0.0217587	0.0655878	0.118434	0.205133	0	-0.57735	-0.0125624	-0.0378671
j13CC2H7	44.0581	0.070709	0.0363518	0.0437954	0.0198445	0.0219003	-1.10333	-0.0780154	-0.0401081
j13CO2	44.9932	-0.0622517	0.0323438	0.0828544	0.00984793	0.0843804	0.154952	-0.00964603	0.00501174
CO2H	44.9977	-0.0736489	-0.00516827	0.81537	0.244963	0.802525	-0.052437	0.00386193	0.000271009
CH3NO	45.0215	-0.0278891	0.0822897	0.0500579	0.0513099	0	-0.975599	0.0272086	-0.0802817
C2H5O	45.034	0.0103422	0.0347505	0.614066	0.229874	0.299591	-1.36803	-0.0141485	-0.0475398
C2H7N	45.0579	0.0217587	0.0655878	0.0390827	0.0676933	0	-0.57735	-0.0125624	-0.0378671
Cj18OO	45.9941	-0.0622526	0.0323426	0.0306414	0.003642	0.0312057	0.154956	-0.00964642	0.00501168
CH2O2	46.0055	-0.0617107	-0.0103346	0.197821	0.064238	0.186127	-0.182044	0.0112341	0.00188136
CH4NO	46.0293	-0.0400298	0.0647078	0.0193931	0.0143486	0	-1.35157	0.0541032	-0.0874572
C2H6O	46.0419	0.0667866	-0.0398763	0.017443	0.0055333	0.0179015	0.0828538	0.00553352	-0.0033039
CH3O2	47.0133	-0.0733538	0.0330962	0.0995885	0.0298801	0.0836272	-0.53418	0.0391841	-0.0176793
CH5NO	47.0371	-0.0754949	0.00994142	0.00400814	0.00550353	0.00268268	-0.240838	0.0181821	-0.00239428
C4	48	-0.0265458	-0.0635876	0.0124078	0.00717738	0.016451	0.56333	-0.014954	-0.0358208
CH4O2	48.0211	-0.0761299	0.00773821	0.000894015	0.00119659	0.000663255	-0.192849	0.0146815	-0.0014923
C4H	49.0078	-0.0586278	-0.0331679	0.0907733	0.0200073	0.115578	1.23978	-0.0726855	-0.0411209
CH5O2	49.029	-0.0692504	0.0254159	0.00209928	0.00363606	0	-0.57735	0.0399817	-0.0146739
C3N	50.0031	0.0651026	0.0528109	0.0449413	0.0356723	0	-1.25984	-0.0820188	-0.0665333
C4H2	50.0157	-0.0531134	-0.0069212	0.534993	0.0978384	0.626018	0.930356	-0.0494144	-0.00643919
C3HN	51.0109	0.0336516	0.0790455	0.0618787	0.0555179	0	-1.11457	-0.0375071	-0.0881018
j13CC3H2	51.019	-0.0692504	0.0254159	0.00607686	0.0105254	0	-0.57735	0.0399817	-0.0146739
C4H3	51.0235	-0.0113076	-0.0647923	0.690878	0.0882972	0.838409	1.67085	-0.0188933	-0.108258
C3O	51.9949	0.0253463	0.0872635	0.0133407	0.00839518	0	-1.58909	-0.0402775	-0.138669
C3H2N	52.0187	0.00791405	0.0919643	0.0613869	0.0403781	0	-1.5203	-0.0120317	-0.139813
C4H4	52.0313	-0.0333314	-0.0631572	0.336146	0.0778425	0.463846	1.64049	-0.0546797	-0.103609
C3HO	53.0027	-0.0671932	0.0536169	0.229201	0.0522022	0.193664	-0.680754	0.0457421	-0.0364999
C3H3N	53.0266	0.0418783	0.0796472	0.0763114	0.0541589	0	-1.40903	-0.0590077	-0.112225
C4H5	53.0391	0.00257046	-0.0838961	1.09517	0.358946	1.70353	1.69486	0.00435657	-0.142192
C2NO	53.998	-0.0222101	0.0825597	0.0162873	0.0170989	0	-0.952533	0.0211558	-0.0786409
C3H2O	54.0106	-0.0816651	0.0131058	0.160753	0.0286428	0.161044	0.0101535	-0.000829188	0.00013307
C2H2N2	54.0218	0.0605552	-0.0116258	0.00760198	0.013167	0	-0.57735	-0.0349616	0.00671216
C3H4N	54.0344	-0.0244796	0.085445	0.0501913	0.0459091	0	-1.09327	0.0267629	-0.0934149
C4H6	54.047	0.0619614	-0.0592079	0.474939	0.0887631	0.553714	0.88748	0.0549895	-0.0525458
C3H3O	55.0184	0.00982456	-0.0850572	1.74862	0.254262	2.1684	1.65096	0.01622	-0.140426
C3H5N	55.0422	0.0605552	-0.0116258	0.022335	0.0386853	0	-0.57735	-0.0349616	0.00671216
C4H7	55.0548	0.0805275	0.0202537	1.92689	0.741451	1.45593	-0.635192	-0.0511504	-0.012865
C2O2	55.9898	-0.0447116	0.0770194	0.0151688	0.0152019	0	-0.997827	0.0446145	-0.0768521
C2H2NO	56.0136	-0.0502691	0.0732729	0.0222856	0.0226367	0	-0.984488	0.0494894	-0.0721363
C3H4O	56.0262	-0.026397	0.0329753	0.39202	0.0751386	0.303071	-1.1838	0.0312486	-0.039036
C3H6N	56.05	0.0217587	0.0655878	0.0483822	0.0838004	0	-0.57735	-0.0125624	-0.0378671
j13CC3H7	56.0581	0.0805275	0.0202536	0.0833628	0.0320772	0.0629877	-0.635189	-0.0511501	-0.0128649
C4H8	56.0626	0.0761784	0.0308883	0.439207	0.259759	0.201417	-0.915427	-0.0697358	-0.028276
C2H3NO	57.0215	0.0540932	0.0669592	0.061414	0.0426725	0	-1.43919	-0.0778506	-0.0963673
C3H5O	57.034	-0.00148051	0.061256	1.14813	0.415528	0.478035	-1.61265	0.00238755	-0.0987843
C4H9	57.0704	0.0721761	0.042228	0.476677	0.337764	0.11822	-1.06126	-0.0765979	-0.0448151
C2H2O2	58.0055	-0.044084	0.0660838	0.106053	0.0462193	0.046016	-1.29895	0.0572629	-0.0858395
C2H4NO	58.0293	-0.0692504	0.0254159	0.00636192	0.0110192	0	-0.57735	0.0399817	-0.0146739
j13CC2H5O	58.0374	-0.0692504	0.0254159	0.0125254	0.0216946	0	-0.57735	0.0399817	-0.0146739
C3H6O	58.0419	0.0314168	-0.0828118	0.639222	0.268892	1.02165	1.42224	0.0446821	-0.117778
C3H8N	58.0657	0.0217587	0.0655878	0.152441	0.264035	0	-0.57735	-0.0125624	-0.0378671
j13CC3H9	58.0738	0.0721761	0.042228	0.0206224	0.0146126	0.00511451	-1.06126	-0.0765979	-0.0448151
CHNO2	59.0007	0.0605552	-0.0116258	0.00534666	0.0092607	0	-0.57735	-0.0349616	0.00671216
C2H3O2	59.0133	-0.0255517	0.0854451	0.0693707	0.0292556	0.0370699	-1.10409	0.0282113	-0.0943391
C2H5NO	59.0371	0.049291	0.0236499	0.0281299	0.0237254	0	-1.18564	-0.0584415	-0.0280403
C3H7O	59.0497	0.0188988	-0.0773927	0.421617	0.158372	0.675336	1.60204	0.0302766	-0.123986
C3H9N	59.0735	0.0605552	-0.0116258	0.00199247	0.00345106	0	-0.57735	-0.0349616	0.00671216
CSO	59.967	0.073251	0.0382631	0.0038559	0.00347598	0.00147779	-0.684157	-0.0501152	-0.026178
CHOP	59.9765	0.0217587	0.0655878	0.000982415	0.00170159	0	-0.57735	-0.0125624	-0.0378671
C5	60	0.0813611	-0.0148804	0.00914904	0.00245039	0.00921987	0.0289064	0.00235186	-0.000430139
C2H4O2	60.0211	-0.0618918	0.0174362	0.300484	0.136707	0.216899	-0.611412	0.0378414	-0.0106607
C2H6NO	60.0449	0.0217587	0.0655878	0.00529078	0.0091639	0	-0.57735	-0.0125624	-0.0378671
C3H8O	60.0575	-0.00142932	-0.0720119	0.0168626	0.0100682	0.023268	0.636199	-0.000909331	-0.0458139
CHO3	60.9926	0.0678422	0.0521683	0.00644409	0.0064929	0	-0.992482	-0.0673322	-0.0517761
C5H	61.0078	-0.0766814	-0.0191384	0.0473266	0.011917	0.0571431	0.823744	-0.0631658	-0.0157651
C2H5O2	61.029	-0.0489141	0.0317914	0.103023	0.0595238	0.0456093	-0.964552	0.0471802	-0.0306645
CH2O3	62.0004	0.079428	-0.0202375	0.0115442	0.00541553	0.0126527	0.204698	0.0162587	-0.00414256
C5H2	62.0157	-0.0560043	0.0551156	0.111077	0.0239451	0.102951	-0.33934	0.0190045	-0.0187029
C2H6O2	62.0368	0.0194904	0.00366784	0.00300463	0.00318826	0	-0.942406	-0.0183678	-0.00345659
CH3O3	63.0082	0.0285138	0.0513859	0.0337978	0.021185	0.0277735	-0.284365	-0.00810834	-0.0146123
C5H3	63.0235	-0.049871	0.0721566	0.235586	0.0415247	0.199846	-0.860693	0.0429237	-0.0621047
C4H2N	64.0187	-0.0341113	0.0812022	0.0131835	0.0132803	0	-0.992709	0.0338626	-0.0806101
j13CC4H3	64.0268	-0.0130635	-0.0793779	0.00136413	0.00236274	0.00545651	1.73205	-0.0226267	-0.137486
C5H4	64.0313	-0.0181941	0.0853936	0.0732762	0.0136339	0.051761	-1.57807	0.0287114	-0.134757
CH5O3	65.0239	0.0476718	0.0752681	0.0354474	0.0268819	0	-1.31864	-0.0628618	-0.0992512
C5H5	65.0391	0.0218753	-0.0282019	0.531588	0.0368635	0.574093	1.15304	0.0252232	-0.0325181
C4H2O	66.0106	-0.0805467	0.0206548	0.0362887	0.00890821	0.0357908	-0.0558957	0.00450221	-0.00115451
C4H4N	66.0344	0.024443	0.0881753	0.0342058	0.0233599	0	-1.46429	-0.0357917	-0.129115
C5H6	66.047	-0.0167114	-0.0855469	0.233231	0.0465138	0.312407	1.7022	-0.0284461	-0.145618
C4H3O	67.0184	-0.0738898	-0.000862557	0.119089	0.0191825	0.116808	-0.118933	0.00878792	0.000102586
C5H7	67.0548	0.0654934	-0.0499595	1.2106	0.354884	1.50356	0.825506	0.0540652	-0.0412419
C3O2	67.9898	0.0308143	0.0707295	0.0159048	0.0133945	0.00520484	-0.798829	-0.0246153	-0.0565008
C3H2NO	68.0136	-0.0692504	0.0254159	0.00987568	0.0171052	0	-0.57735	0.0399817	-0.0146739
C4H4O	68.0262	-0.0522222	-0.0660641	0.326564	0.0831348	0.450364	1.48915	-0.0777664	-0.098379
C5H8	68.0626	0.0377335	-0.0715456	0.389265	0.169126	0.625465	1.39659	0.0526983	-0.0999201
C3HO2	68.9977	-0.0223511	0.0794107	0.177717	0.0513489	0.0970684	-1.57059	0.0351044	-0.124722
C3H3NO	69.0215	-0.0692504	0.0254159	0.0060863	0.0105418	0	-0.57735	0.0399817	-0.0146739
C4H5O	69.034	-0.0210718	0.028237	0.58575	0.0851197	0.487141	-1.15848	0.0244112	-0.032712
C5H9	69.0704	0.0521429	-0.0641721	0.917224	0.4543	1.44069	1.15225	0.0600815	-0.0739421
C3H2O2	70.0055	-0.0332862	0.0753819	0.0598655	0.0217474	0.0282544	-1.45356	0.0483834	-0.109572
C3H4NO	70.0293	-0.0692504	0.0254159	0.00890108	0.0154171	0	-0.57735	0.0399817	-0.0146739
C4H6O	70.0419	0.000384008	-0.0916797	0.312929	0.0529912	0.385529	1.37004	0.000526105	-0.125605
C4H8N	70.0657	0.0217587	0.0655878	0.0159238	0.0275809	0	-0.57735	-0.0125624	-0.0378671
C5H10	70.0783	0.0825977	0.000752354	0.228605	0.124915	0.196319	-0.258465	-0.0213486	-0.000194457
C3H3O2	71.0133	-0.0637155	0.0334044	0.330535	0.153328	0.21263	-0.768969	0.0489953	-0.0256869
C4H7O	71.0497	0.00137985	0.00666541	0.732626	0.135112	0.603887	-0.952836	-0.00131478	-0.00635104
C5H11	71.0861	0.0731811	0.0425397	0.116613	0.0994797	0.0190873	-0.980357	-0.0717436	-0.0417041
C3H4O2	72.0211	-0.0719468	0.0118883	0.0885715	0.0340883	0.0765187	-0.353575	0.0254386	-0.0042034
C3H6NO	72.0449	-0.0692504	0.0254159	0.00379431	0.00657194	0	-0.57735	0.0399817	-0.0146739
C4H8O	72.0575	0.0807633	0.0166985	0.178454	0.0764749	0.130269	-0.630083	-0.0508876	-0.0105214
C4H10N	72.0813	0.0217587	0.0655878	0.0112675	0.019516	0	-0.57735	-0.0125624	-0.0378671
j13CC4H11	72.0894	0.0731811	0.0425397	0.00630625	0.00537971	0.00103221	-0.980357	-0.0717436	-0.0417041
C5H12	72.0939	0.0217587	0.0655878	0.00379649	0.00657572	0	-0.57735	-0.0125624	-0.0378671
C6H	73.0078	0.017619	0.0614231	0.0171219	0.00975547	0.0127932	-0.443719	-0.0078179	-0.0272546
C3H5O2	73.029	-0.0434981	0.0319037	0.281034	0.128527	0.149311	-1.02487	0.0445798	-0.0326971
C3H9Si	73.0474	0.0155231	0.0511015	0.011561	0.0140576	0.00889198	-0.189864	-0.00294727	-0.00970235
C3H7NO	73.0528	0.0605552	-0.0116258	0.00451583	0.00782165	0	-0.57735	-0.0349616	0.00671216
C4H9O	73.0653	0.076302	0.0235525	0.0647973	0.0389594	0.0307306	-0.874416	-0.0667196	-0.0205947
C4H11N	73.0892	0.0217587	0.0655878	0.0193853	0.0335763	0	-0.57735	-0.0125624	-0.0378671
C2H2O3	74.0004	0.0217587	0.0655878	0.00650394	0.0112652	0	-0.57735	-0.0125624	-0.0378671
C6H2	74.0157	-0.000523045	0.0908685	0.10552	0.0327179	0.0527016	-1.61436	0.000844382	-0.146694
C3H6O2	74.0368	-0.0713058	0.0170767	0.146049	0.138932	0.0855382	-0.435541	0.0310566	-0.00743758
C4H10O	74.0732	0.0605552	-0.0116258	0.00255945	0.00443309	0	-0.57735	-0.0349616	0.00671216
CHNO3	74.9956	0.0605552	-0.0116258	0.00417666	0.00723419	0	-0.57735	-0.0349616	0.00671216
C2H3O3	75.0082	-0.0326816	0.0815311	0.0188662	0.0190646	0	-0.989593	0.0323415	-0.0806827
C6H3	75.0235	0.0509786	0.065654	0.0738305	0.0341953	0.0416655	-0.940626	-0.0479518	-0.0617558
C2H5NO2	75.032	-0.0692504	0.0254159	0.019951	0.0345562	0	-0.57735	0.0399817	-0.0146739
C3H7O2	75.0446	-0.022747	-0.0249971	0.0339033	0.00939745	0.0310838	-0.300025	0.00682468	0.00749976
C2H4O3	76.016	-0.0255897	0.0878188	0.0687016	0.033774	0.0246241	-1.30507	0.0333964	-0.11461
C6H4	76.0313	-0.0190617	0.0890248	0.200854	0.0935288	0.0619431	-1.48522	0.0283109	-0.132222
C2H5O3	77.0239	0.0623852	0.0605851	0.117409	0.0530602	0.055389	-1.16885	-0.0729192	-0.0708151
C6H5	77.0391	0.0622975	0.0605636	0.752799	0.11717	0.609751	-1.22086	-0.0760564	-0.0739396
C5H2O	78.0106	0.0535732	0.070124	0.0191445	0.00965615	0.00602291	-1.35888	-0.0727997	-0.0952902
j13CC5H5	78.0425	-0.0732779	-0.0426733	0.0206915	0.0207312	0.0395693	0.910601	-0.0667269	-0.0388583
C6H6	78.047	0.0611018	0.0610945	0.252732	0.0758912	0.170852	-1.07891	-0.0659233	-0.0659155
C5H3O	79.0184	0.0573844	0.052195	0.0562998	0.0388187	0.0308867	-0.65466	-0.0375673	-0.03417
C5H5N	79.0422	-0.0692504	0.0254159	0.0184557	0.0319662	0	-0.57735	0.0399817	-0.0146739
j13CC5H6	79.0503	-0.073368	-0.0424707	0.00581077	0.00582304	0.0110873	0.906146	-0.0664821	-0.0384847
C6H7	79.0548	0.0713271	-0.0379487	0.798697	0.235769	0.945516	0.622723	0.044417	-0.0236315
C4H2NO	80.0136	-0.0153787	0.0820688	0.016025	0.0174874	0	-0.916373	0.0140927	-0.0752057
C5H4O	80.0262	0.015654	-0.0533709	0.0358241	0.0115992	0.0374251	0.138024	0.00216062	-0.00736645
C5H6N	80.05	-0.0161073	0.0821613	0.0305482	0.0331813	0	-0.920643	0.0148291	-0.0756413
C6H8	80.0626	0.0588086	-0.0640732	0.164372	0.0639955	0.224037	0.932338	0.0548295	-0.0597378
C4HO2	80.9977	0.0666965	0.0545611	0.00929998	0.00848473	0	-1.09608	-0.073105	-0.0598036
C5H5O	81.034	-0.0349938	-0.0211516	0.2862	0.0177038	0.307368	1.19567	-0.041841	-0.0252903
C6H9	81.0704	0.0790231	-0.0245397	0.679587	0.295413	0.749666	0.237226	0.0187463	-0.00582145
C4H2O2	82.0055	-0.000749277	0.0872108	0.0417814	0.0248639	0	-1.68041	0.00125909	-0.14655
C5H6O	82.0419	-0.0251165	-0.0801074	0.303247	0.133546	0.531112	1.70627	-0.0428555	-0.136685
C6H10	82.0783	0.0801854	-0.0197949	0.166103	0.0842166	0.178583	0.148191	0.0118827	-0.00293342
C4H3O2	83.0133	-0.0132079	0.0834669	0.0884165	0.0540437	0	-1.63602	0.0216084	-0.136553
C5H7O	83.0497	0.000501758	-0.0845221	0.684178	0.336678	1.25656	1.70009	0.000853034	-0.143695
C6H11	83.0861	0.0774875	0.026262	0.178116	0.139256	0.0599596	-0.848484	-0.065747	-0.0222829
C4H4O2	84.0211	-0.0754998	0.0183906	0.129113	0.0353076	0.116928	-0.345119	0.0260565	-0.00634695
C5H8O	84.0575	0.0746336	-0.0382323	0.184973	0.0306362	0.193286	0.271336	0.0202508	-0.0103738
C5H10N	84.0813	-4.92958e-20	9.46414e-21	-4.7e-19	1	0	4.7e-19	-2.3169e-38	4.44815e-39
C6H12	84.0939	0.0752382	0.0377747	0.0402815	0.0374874	0.00612103	-0.911251	-0.0685609	-0.0344222
C4H5O2	85.029	-0.0554776	0.0369691	0.468058	0.210778	0.270419	-0.937666	0.0520195	-0.0346647
C5H9O	85.0653	0.0810808	-0.0150649	0.234505	0.0953439	0.223637	-0.113988	-0.00924226	0.00171722
C6H13	85.1017	0.066929	0.0297006	0.0281955	0.0238174	0.00166739	-1.11381	-0.0745464	-0.0330809
C7H2	86.0157	0.0606209	0.0588001	0.0196388	0.0207511	0	-0.946399	-0.0573715	-0.0556484
C3H4NO2	86.0242	-0.0692504	0.0254159	0.0168662	0.0292132	0	-0.57735	0.0399817	-0.0146739
C4H6O2	86.0368	-0.0655181	-0.0493128	0.109751	0.037254	0.138172	0.762887	-0.0499829	-0.0376201
C5H10O	86.0732	0.0815606	0.000680304	0.0422072	0.0208475	0.033512	-0.417088	-0.0340179	-0.000283747
j13CC5H13	86.1051	0.0663588	0.0308303	0.00181275	0.00156468	4.0263e-05	-1.13281	-0.0751719	-0.0349249
C3H3O3	87.0082	-0.047623	0.0635198	0.084403	0.010576	0.0713118	-1.23782	0.0589489	-0.0786263
C3H5NO2	87.032	-0.0692504	0.0254159	0.0257967	0.0446812	0	-0.57735	0.0399817	-0.0146739
C4H7O2	87.0446	-0.0543908	0.0382471	0.213423	0.1028	0.114115	-0.966034	0.0525434	-0.036948
C5H11O	87.081	0.0605552	-0.0116258	0.00599792	0.0103887	0	-0.57735	-0.0349616	0.00671216
C2O4	87.9797	0.0605552	-0.0116258	0.00105975	0.00183554	0	-0.57735	-0.0349616	0.00671216
C2H2NO3	88.0035	0.0217587	0.0655878	0.00043536	0.000754065	0	-0.57735	-0.0125624	-0.0378671
C3H4O3	88.016	-0.00560027	0.0840089	0.0175261	0.00818958	0.00376184	-1.6807	0.0094124	-0.141194
C7H4	88.0313	-0.0427146	0.0790883	0.0185385	0.0126819	0.00434851	-1.11892	0.0477942	-0.0884933
C4H8O2	88.0524	-0.065741	0.0182972	0.0392023	0.0250261	0.0251927	-0.559797	0.0368016	-0.0102427
C5H12O	88.0888	0.0605552	-0.0116258	0.000919475	0.00159258	0	-0.57735	-0.0349616	0.00671216
C3H5O3	89.0239	-0.0591106	0.0518348	0.0702085	0.0314341	0.0390777	-0.990351	0.0585402	-0.0513347
C7H5	89.0391	-0.0447133	0.0714159	0.110782	0.0582597	0.0361244	-1.28146	0.0572982	-0.0915165
C4H9O2	89.0603	0.0605552	-0.0116258	0.00455558	0.0078905	0	-0.57735	-0.0349616	0.00671216
C3H6O3	90.0317	-0.0329489	0.0775693	0.0389944	0.0199488	0.0100431	-1.45128	0.0478181	-0.112575
C7H6	90.047	-0.0575477	0.0588218	0.0542377	0.0373274	0.0155638	-1.03607	0.0596236	-0.0609436
C4H10O2	90.0681	0.0605552	-0.0116258	0.00104536	0.00181062	0	-0.57735	-0.0349616	0.00671216
C6H3O	91.0184	0.0217587	0.0655878	0.0141176	0.0244524	0	-0.57735	-0.0125624	-0.0378671
C3H7O3	91.0395	0.0238751	-0.0260955	0.0422078	0.0337498	0.0276875	-0.430235	-0.0102719	0.0112272
C7H7	91.0548	0.074184	0.0398919	0.65412	0.168235	0.51728	-0.813387	-0.0603403	-0.0324475
C6H4O	92.0262	-0.031683	0.0789518	0.0174886	0.0162096	0.00337389	-0.870762	0.0275884	-0.0687482
C3H8O3	92.0473	0.0596232	-0.0403142	0.0267281	0.0327588	0.0266701	-0.00177036	-0.000105555	7.13709e-05
C6H6N	92.05	-0.0261204	0.0824437	0.0319491	0.0329665	0	-0.969136	0.0253142	-0.0798992
C7H8	92.0626	0.0708995	-0.0418257	0.0903789	0.0261002	0.107179	0.643677	0.0456364	-0.0269222
C6H5O	93.034	-0.0216784	0.0855097	0.0624813	0.048315	0.010563	-1.07458	0.0232951	-0.0918869
C3H9O3	93.0552	0.0460007	-0.0513588	0.0454802	0.0403111	0.051688	0.153998	0.00708399	-0.00790912
C7H9	93.0704	0.080469	0.0209464	0.29428	0.137067	0.208804	-0.623609	-0.0501812	-0.0130624
C2H6O4	94.0266	0.0364786	0.0826605	0.0180569	0.0129619	0	-1.39307	-0.0508174	-0.115152
C6H6O	94.0419	-0.0777905	-0.0309436	0.090055	0.0162416	0.101745	0.719753	-0.05599	-0.0222717
C6H8N	94.0657	0.0748452	0.0345533	0.0376536	0.0386991	0	-0.972983	-0.0728231	-0.0336198
C7H10	94.0783	0.0635324	-0.0534053	0.0700424	0.0267761	0.0936162	0.880404	0.0559342	-0.0470182
C5H3O2	95.0133	0.00794424	0.0913115	0.0416466	0.014554	0.0184014	-1.59717	-0.0126883	-0.14584
C6H7O	95.0497	-0.0111418	-0.084359	0.339142	0.0687808	0.457452	1.7201	-0.019165	-0.145106
C6H9N	95.0735	0.0751111	0.0276986	0.0489371	0.0520915	0	-0.939445	-0.0705627	-0.0260213
C7H11	95.0861	0.081476	0.0092309	0.288415	0.172443	0.196685	-0.531946	-0.0433408	-0.00491034
CH4O5	96.0059	0.0756502	0.01585	0.00373687	0.00393587	0.000537079	-0.812983	-0.0615024	-0.0128858
C4H2NO2	96.0086	0.0450836	0.0229306	0.00878668	0.00736124	0	-1.19364	-0.0538136	-0.0273709
C5H4O2	96.0211	-0.0690053	0.0508004	0.0362824	0.0300651	0.0191582	-0.569572	0.0393035	-0.0289345
C6H8O	96.0575	-0.000749492	-0.0875678	0.216801	0.0908356	0.369553	1.68163	-0.00126037	-0.147257
C7H12	96.0939	0.0788004	-0.0252289	0.0651421	0.0402567	0.0753215	0.252862	0.0199256	-0.00637942
C5H5O2	97.029	-0.0769333	-0.00905104	0.216773	0.0654149	0.223569	0.103888	-0.00799247	-0.000940298
C6H9O	97.0653	0.0736328	-0.0418031	0.279607	0.10366	0.327487	0.461897	0.0340108	-0.0193087
C7H13	97.1017	0.0716074	0.0330293	0.0647462	0.0584537	0.00260999	-1.063	-0.0761185	-0.0351101
C4H2O3	98.0004	0.0646284	0.0556949	0.00703089	0.00719445	0	-0.977267	-0.0631592	-0.0544287
C4H4NO2	98.0242	-0.058317	0.0648331	0.014005	0.0149933	0	-0.934085	0.054473	-0.0605596
C5H6O2	98.0368	-0.0660114	-0.0440966	0.132877	0.0302042	0.151598	0.619826	-0.0409155	-0.0273322
C6H10O	98.0732	0.0690044	-0.0482591	0.0945681	0.0410371	0.123077	0.694711	0.0479381	-0.0335262
C7H14	98.1096	0.0742301	0.0388818	0.0103252	0.0103327	0.000206574	-0.979286	-0.0726925	-0.0380764
C4H3O3	99.0082	0.0360435	0.0825119	0.0632225	0.030374	0.0163885	-1.54191	-0.0555757	-0.127226
C4H5NO2	99.032	-0.0692504	0.0254159	0.0162284	0.0281084	0	-0.57735	0.0399817	-0.0146739
C5H7O2	99.0446	0.0172261	0.03648	0.251395	0.0606774	0.166504	-1.39905	-0.0241003	-0.0510375
C6H11O	99.081	0.0772642	-0.0327877	0.0859205	0.0564847	0.101005	0.267054	0.0206338	-0.0087561
C7H15	99.1174	-0.0511118	0.072582	0.00364071	0.00371047	0	-0.981199	0.0501509	-0.0712174
C4H4O3	100.016	0.0680591	0.0504547	0.0342792	0.0055093	0.0278464	-1.16762	-0.0794671	-0.0589118
C4H6NO2	100.04	-0.0692504	0.0254159	0.0104971	0.0181816	0	-0.57735	0.0399817	-0.0146739
C5H8O2	100.052	-0.0209038	-0.0801396	0.0950323	0.0426375	0.168423	1.72127	-0.035981	-0.137942
C5H10NO	100.076	0.0605552	-0.0116258	0.00448791	0.00777328	0	-0.57735	-0.0349616	0.00671216
C5H12N2	100.1	0.0217587	0.0655878	0.00261249	0.00452497	0	-0.57735	-0.0125624	-0.0378671
C7H16	100.125	0.0605552	-0.0116258	0.00160803	0.0027852	0	-0.57735	-0.0349616	0.00671216
C4H5O3	101.024	0.0171432	0.086478	0.0830656	0.0413493	0.0132086	-1.68944	-0.0289624	-0.146099
C8H5	101.039	-0.0773323	0.00280111	0.0212739	0.0270284	0.01897	-0.08524	0.0065918	-0.000238767
C5H9O2	101.06	0.0597868	0.054641	0.108076	0.017559	0.0838728	-1.37842	-0.0824112	-0.0753181
C3H2O4	101.995	0.0605552	-0.0116258	0.00163396	0.0028301	0	-0.57735	-0.0349616	0.00671216
C4H6O3	102.032	-0.0281085	0.0747437	0.0388747	0.0140813	0.0175432	-1.51489	0.0425812	-0.113228
C8H6	102.047	-0.0285143	0.0866667	0.0553701	0.0274868	0.0187998	-1.33047	0.0379374	-0.115307
C5H10O2	102.068	0.0605552	-0.0116258	0.00276656	0.00479182	0	-0.57735	-0.0349616	0.00671216
C7H3O	103.018	0.0221551	0.065284	0.00376813	0.00658289	0	-0.572413	-0.0126819	-0.0373694
C4H7O3	103.039	-0.0476109	0.0610097	0.0708725	0.0404244	0.0211094	-1.23102	0.0586098	-0.0751039
C8H7	103.055	0.0401533	0.0766247	0.0985749	0.0400767	0.034461	-1.59978	-0.0642365	-0.122583
C3H4O4	104.011	0.0217587	0.0655878	0.00315841	0.00547053	0	-0.57735	-0.0125624	-0.0378671
C7H4O	104.026	-0.0127206	0.0912897	0.170237	0.0816978	0.0526014	-1.43988	0.0183162	-0.131447
C4H8O3	104.047	-0.0130635	-0.0793779	0.00156653	0.00271332	0.00626614	1.73205	-0.0226267	-0.137487
C8H8	104.063	0.0293181	0.078663	0.0594561	0.0305262	0.0078736	-1.68978	-0.0495411	-0.132923
C7H5O	105.034	-0.0233029	0.0780264	0.202658	0.119025	0.0165839	-1.56332	0.0364299	-0.12198
C4H9O3	105.055	0.0200955	0.0521251	0.0374384	0.0513988	0.0250731	-0.240575	-0.00483448	-0.01254
C8H9	105.07	0.0726995	0.0276113	0.197686	0.106496	0.091461	-0.997451	-0.0725142	-0.0275409
C3H6O4	106.027	0.0217587	0.0655878	0.00281197	0.00487048	0	-0.57735	-0.0125624	-0.0378671
C7H6O	106.042	-0.0476292	0.0732052	0.0500734	0.0323925	0.0115239	-1.19008	0.0566824	-0.0871198
C4H10O3	106.063	0.0600925	-0.0371283	0.0120367	0.0151921	0.0109648	-0.0705585	-0.00424004	0.00261971
C8H10	106.078	0.0667703	0.0475039	0.0496334	0.0200615	0.0347213	-0.743319	-0.0496316	-0.0353105
C6H3O2	107.013	0.0187413	0.0678036	0.00596782	0.00972057	0	-0.613938	-0.011506	-0.0416272
C7H7O	107.05	-0.0102455	0.0916258	0.121662	0.0292515	0.080392	-1.41086	0.0144549	-0.129271
C4H11O3	107.071	0.0605552	-0.0116258	0.0214403	0.0371357	0	-0.57735	-0.0349616	0.00671216
C8H11	107.086	0.0786411	0.0282831	0.137791	0.0787591	0.0833093	-0.69175	-0.0544	-0.0195648
C6H4O2	108.021	0.0211349	0.08811	0.0130611	0.00964108	0	-1.35473	-0.0286321	-0.119365
C6H6NO	108.045	-0.0692504	0.0254159	0.0108247	0.0187489	0	-0.57735	0.0399817	-0.0146739
C7H8O	108.058	0.0405806	-0.0594593	0.0788541	0.0100377	0.0920858	1.3182	0.0534934	-0.0783793
C8H12	108.094	0.0803715	0.0133681	0.0451077	0.0322061	0.0246436	-0.635412	-0.051069	-0.00849425
C6H5O2	109.029	-0.0245249	0.0790329	0.0621237	0.0299411	0.0157288	-1.54954	0.0380023	-0.122465
C7H9O	109.065	0.0472061	-0.0752373	0.220605	0.0384219	0.264501	1.14248	0.0539322	-0.0859574
C8H13	109.102	0.0733647	0.0360171	0.108849	0.105719	0	-1.02961	-0.0755368	-0.0370834
C2H6O5	110.021	0.0505995	0.0675605	0.0140095	0.0139834	0	-1.00186	-0.0506938	-0.0676864
C6H6O2	110.037	-0.0727066	0.0038772	0.0683757	0.0384172	0.0598894	-0.220899	0.0160608	-0.00085647
C7H10O	110.073	0.0810706	-0.0176349	0.0747917	0.0207512	0.0744846	-0.0147983	-0.00119971	0.000260967
C8H14	110.11	0.072367	0.0412177	0.0193681	0.0182797	0	-1.05954	-0.0766757	-0.0436718
C4HNO3	110.996	0.0605552	-0.0116258	0.000343621	0.000595169	0	-0.57735	-0.0349616	0.00671216
C5H3O3	111.008	0.0653179	0.0564047	0.00738332	0.00631842	0	-1.16854	-0.0763265	-0.0659111
C6H7O2	111.045	-0.0593246	0.0456261	0.268358	0.0920317	0.180738	-0.952061	0.0564806	-0.0434388
C7H11O	111.081	0.0826096	-0.00265377	0.103017	0.0703166	0.0868229	-0.230306	-0.0190255	0.000611179
C8H15	111.117	0.0506781	0.0331698	0.0145605	0.0112404	0	-1.29537	-0.0656467	-0.0429671
C5H4O3	112.016	0.0596533	0.062773	0.0119771	0.0109175	0	-1.09706	-0.0654432	-0.0688658
C9H4	112.031	-0.0692504	0.0254159	0.00478643	0.00829034	0	-0.57735	0.0399817	-0.0146739
C5H6NO2	112.04	-0.0692504	0.0254159	0.00747238	0.0129425	0	-0.57735	0.0399817	-0.0146739
C6H8O2	112.052	-0.0194924	-0.0319852	0.0837531	0.00842854	0.0821849	-0.186059	0.00362673	0.00595113
C7H12O	112.089	0.0806102	0.0203703	0.0239415	0.0182429	0.0131187	-0.59326	-0.0478228	-0.0120849
C8H16	112.125	0.0752197	0.0368885	0.0175479	0.0115749	0.0088664	-0.750032	-0.0564172	-0.0276676
C5H5O3	113.024	-0.0437854	0.0766995	0.0666078	0.0131493	0.0542034	-0.943346	0.0413048	-0.0723542
C5H7NO2	113.048	-0.0692504	0.0254159	0.0232558	0.0402802	0	-0.57735	0.0399817	-0.0146739
C6H9O2	113.06	0.0649269	0.00558951	0.135573	0.0301507	0.11072	-0.824307	-0.0535197	-0.00460747
C7H13O	113.097	0.0750347	0.0261777	0.0212485	0.0228337	0	-0.930576	-0.0698255	-0.0243604
C8H17	113.133	0.0717097	0.0369097	0.00716483	0.00523388	0.00411641	-0.58244	-0.0417666	-0.0214977
C4H2O4	113.995	0.0605552	-0.0116258	0.00084449	0.0014627	0	-0.57735	-0.0349616	0.00671216
C5H6O3	114.032	-0.0649741	-0.00130492	0.0244911	0.00914002	0.0218889	-0.284708	0.0184987	0.000371521
C9H6	114.047	0.00324251	0.0854926	0.0278236	0.0260214	0	-1.06926	-0.00346709	-0.0914138
C6H10O2	114.068	0.00176497	-0.0920252	0.0444986	0.0398815	0.106307	1.5498	0.00273535	-0.142621
C8H18	114.141	0.0732497	0.038966	0.00362419	0.00351378	0	-1.03142	-0.0755514	-0.0401904
C4H3O4	115.003	0.0495738	-0.0685104	0.00229044	0.0023412	0.00389518	0.685435	0.0339796	-0.0469594
C5H7O3	115.039	-0.0256515	0.0872895	0.0719923	0.0510585	0	-1.41	0.0361686	-0.123078
C9H7	115.055	0.0596294	0.0581189	0.196583	0.0783449	0.0886614	-1.37751	-0.0821403	-0.0800597
C3H2NO4	115.998	0.0605552	-0.0116258	0.00126764	0.00219562	0	-0.57735	-0.0349616	0.00671216
C5H8O3	116.047	-0.0512901	0.0659659	0.0399235	0.0227021	0.0134573	-1.1658	0.0597942	-0.0769033
C9H8	116.063	0.0672812	0.0529903	0.0430461	0.028153	0.0105801	-1.1532	-0.0775885	-0.0611084
C3H3NO4	117.006	0.0605552	-0.0116258	0.00169689	0.0029391	0	-0.57735	-0.0349616	0.00671216
C8H5O	117.034	-0.00432771	0.0883927	0.00820911	0.00411927	0.00340015	-1.16743	0.0050523	-0.103192
C5H9O3	117.055	-0.00505139	0.0697591	0.064425	0.0338751	0.00828802	-1.65718	0.00837104	-0.115603
C9H9	117.07	0.0719598	0.0453209	0.0842175	0.0556067	0.0320484	-0.938182	-0.0675113	-0.0425192
C4H6O4	118.027	0.0692716	0.00398492	0.00560821	0.00745678	0	-0.752096	-0.0520989	-0.00299704
C8H6O	118.042	-0.0628476	0.0587011	0.0581594	0.0613675	0.00596516	-0.85052	0.0534531	-0.0499265
C5H10O3	118.063	0.0609868	-0.0254814	0.0232379	0.0332197	0.0129035	-0.311092	-0.0189725	0.00792707
C9H10	118.078	0.0131262	0.0782113	0.02353	0.0212638	0.00493755	-0.87437	-0.0114771	-0.0683857
C3H3O5	118.998	-0.0660725	0.0344093	0.0184351	0.0245572	0.000443198	-0.732655	0.0484083	-0.0252102
C8H7O	119.05	-0.0212834	0.077062	0.100713	0.0485109	0.0239723	-1.58192	0.0336686	-0.121906
C9H11	119.086	0.0757447	0.0364119	0.0834955	0.0557622	0.0335829	-0.895098	-0.0677989	-0.0325922
						100
